1 **Diversity and abundance of archaeal amoA genes in the permanent and temporary oxygen**  
2 **minimum zones of Indian Ocean**

3

4 Prasannakumar Chinnamani <sup>1,2</sup>, Anandjothi Elamaran<sup>3</sup>

5

6 <sup>1</sup> PG and Research Department of Biotechnology and Microbiology, National College  
7 (Autonomous), Dindigul road, Tiruchirappalli, Tamil Nadu 620001, India.

8 <sup>2</sup> Institute of Marine Microbes and Ecosphere, State Key Laboratory for Marine Environmental  
9 Sciences, Xiamen University, Xiamen, Fujian, (361102) China PR.

10 <sup>3</sup> Central Aquaculture Genetics Laboratory, Rajiv Gandhi Centre for Aquaculture, Sirkali, Tamil  
11 Nadu 609109, India.

12

13 **Abstract**

14 Oxygen minimum zones are results of oxygen consumption exceeding the oxygen availability in  
15 stratified water columns of the marine environment. We compared the ammonia monooxygenase  
16 subunit A (amoA) gene abundance and the diversity of ammonia-oxidising archaea (AOA) in the  
17 Arabian Sea (AS) with those of the Bay of Bengal (BoB). Three primer pairs targeting amoA  
18 genes of water column A (WCA), water column B (WCB) and total AOA (amoAt) captured  
19 different densities of gene copy numbers in both marginal seas. Water column A (WCA)  
20 ecotypes were more abundant in the AS than in the BoB. Core-OMZ depths of the BoB  
21 contained 10 times lower amoA copy numbers than those of the AS. Along with sampling depth,  
22 concentration of ammonia shapes the WCA/WCB ecotypes in AS/BoB. Among the total AOA  
23 populations, WCB ecotypes were more abundant. The amoA gene sequences were either of  
24 Nitrosopumilales or Ca. Nitrosotaleales members and belonged to NP- $\gamma$ , NP- $\delta$ , NS- $\beta$ , NS- $\gamma$  and  
25 NS- $\epsilon$  sub-clades. Pairwise distance and nucleotide diversity index analysis reveals that BoB  
26 nurtures two times more diverse amoA sequences than the AS. The core OMZ region of the BoB  
27 contains a two-fold higher diversity of amoA gene sequences compared to the AS, whereas the  
28 AS contains 13 times more abundant amoA copies than the BoB.

29

30 **Keywords:** Ammonia-oxidising archaea, amoA abundance, amoA diversity, AOA phylogeny

31

## 32 INTRODUCTION

33 In stratified water columns of marine environments, when the demand for oxygen  
34 exceeds oxygen availability during organic matter decomposition, oxygen minimum zones  
35 (OMZs) are formed, in particular, when the oxygen concentration drops below 20  $\mu\text{M}$  (Paulmier  
36 and Ruiz-Pino, 2009). Such zones are currently expanding due to global warming (Whitney et  
37 al., 2007; Falkowski et al., 2011), and active climate gasses such as carbon dioxide ( $\text{CO}_2$ ),  
38 nitrous oxide ( $\text{N}_2\text{O}$ ) and methane ( $\text{CH}_4$ ) are produced during microbial organic matter  
39 degradation in OMZs (Paulmier and Ruiz-Pino, 2009). Currently, OMZs occupy about 7% of the  
40 ocean volume (Paulmier and Ruiz-Pino, 2009; Wright et al., 2012). In OMZs, ammonia-  
41 oxidizing archaea (AOA) along with *Nitrospina*, *Planktomycetes* and SUP05 have been  
42 recognised as key players of the carbon, nitrogen and sulphur cycles (Hawley et al., 2014;  
43 Hallam et al., 2006; Walsh et al., 2009; Walker et al., 2010). Being ubiquitous and abundant in  
44 the marine environment, AOA are major players of nitrification (conversion of ammonia to  
45 nitrate) (Stahl and Torre, 2012) and significant contributors to carbon fixation processes  
46 (Hansman et al., 2009). They also play a role in methane production (Metcalf et al., 2012) and  
47 cobalamin synthesis (Heal et al., 2016). The *amoA* genes that encode for ammonia  
48 monooxygenase subunit A have been sequenced for studying the diversity and ecology of AOA  
49 (Zheng et al., 2017). After the 16S ribosomal RNA (rRNA) gene, *amoA* is the second-largest  
50 sequenced gene in microbial ecology, comprising 56% of the sequences available in GenBank  
51 (~68,000 archaeal sequences as of November 2019, excluding short fragments from high-  
52 throughput sequencing).

53 The abundance of archaeal *amoA* genes is one to three orders higher than that of the  
54 bacterial *amoA* gene in several oceans (Wuchter et al., 2006a; Mincer et al., 2007; Agogue et al.,  
55 2008; Beman et al., 2008). The abundances of *amoA* and 16S rRNA genes of Thaumarchaeota in  
56 the Arabian Sea (AS) reveal that the majority of Thaumarchaeota were AOA (Pitcher et al.,  
57 2011), despite the fact that *amoA* genes per cell could vary based on environmental parameters  
58 (Wuchter et al., 2006; Agogue et al., 2008). Also, AOA *amoA* or 16S rRNA gene copies and  
59 rates of ammonia oxidation are positively correlated, revealing their dominant role in ammonia  
60 oxidation in the coastal eastern Pacific (Santoro et al., 2010), the Gulf of California (Beman et  
61 al., 2008) and the North Sea (Wuchter et al., 2006a). In addition, similar patterns of abundances

62 did not correlate with oxidation rates in OMZs of AS (Newell et al., 2011), the Central California  
63 Current (Santoro et al., 2010) and the South Pacific Ocean (Lam et al., 2009).

64 Interestingly, the obligate aerobic AoA *amoA* gene copy numbers are abundant in OMZs,  
65 but it is unclear which metabolic function supports their survival and growth in OMZs of AS.  
66 This may be due to the micro-molar concentration of oxygen or the ammonium input from the  
67 mesopelagic waters below the OMZs. Despite their close geographical locations, AS and BoB  
68 are highly different. The BoB is less productive than the AS, as the flow of nutrient-rich water  
69 into subsurface and oxycline layers of the AS makes them highly productive, while this process  
70 is unlikely in the BoB (Kumar et al., 2002). The OMZ of the Arabian Sea is strong, whereas that  
71 of the Bay of Bengal is relatively weak (Ittekkot et al., 1991; Rao et al., 1994; Naqvi et al.,  
72 1994); the condition in the BoB is possibly due to the robust stratification and weak upwelling  
73 (MsCreary et al., 2013). While nitrate is intensely being removed in the nearby OMZ of the AS,  
74 such volumes of loss do not occur in the OMZ of the BoB, which could be attributed to the  
75 differences in the rates of decomposition of exported organic matter throughout the water  
76 column (Azhar et al., 2017). Another study confirmed that the abundant availability of nitrate  
77 and the highly variable oxygen concentrations inhibit nitrate loss in the BoB (Johnson et al.,  
78 2019).

79 Numerous *amoA*-based studies proved that AOA diversity and abundance depend on  
80 multiple factors and are strongly partitioned by ecosystem (Francis et al., 2005; Biller et al.,  
81 2012; Cao et al., 2013; Yao et al., 2013; Sintes et al., 2013; Restrepo-Ortiz et al., 2014).  
82 Although differences in abundance and diversity of AOA were clearly observed among  
83 geographically distinct seas, geochemically similar seas may also house distinct AOA  
84 populations (Techtman et al., 2017). Thus, biogeography only in part contributes to determining  
85 the diversity and distribution of AOA. Thus, true drivers of AOA diversity and distribution are  
86 still unknown, especially in the global OMZs. Peng *et al.* (2013) conducted a comparison  
87 between AS (surface and anoxic layers) and the South Pacific Ocean and showed that the AOA  
88 community composition was determined by the topography and communication of AOA and  
89 anammox bacteria in their respective seas. We therefore hypothesise that the differences in  
90 mineralisation depth (Azhar et al., 2017) and variable oxygen concentrations in the BoB and the  
91 AS (Johnson et al., 2019) could have shaped unique OMZ features, which in turn could be  
92 shaping specific *amoA* phylotypes in the respective seas.

93

## 94 **METHODS**

### 95 **Sample collection and physicochemical parameters**

96 Six sampling sites were chosen in the Arabian Sea and the Bay of Bengal, and water  
97 samples were collected during the post-monsoon season of November 2011 and January 2012 on  
98 FORV Sagar Sampada. The latitude and longitude positions of the sampling sites are provided in  
99 Table 1. We selected three sampling stations in the Arabian Sea (1, 2 and 3) and three in the Bay  
100 of Bengal (5, 6 and 7). Maximum water depth ranged between 1,700 and 4,400 (m) for all  
101 stations (Fig. 1). All three stations in the Arabian Sea are within a well-documented OMZ with  
102 abundant AOA (Newell et al., 2011; Pitcher et al., 2011). In contrast, stations 5 and 6 of the BoB  
103 are within a well-documented OMZ with AOA (Bristow et al., 2017). The oxygen concentration  
104 was  $< 10 \mu\text{M}$  in the core the OMZ of both seas (Fig. 2). Samples were collected in 12-L Niskin  
105 bottles (12) mounted on a conductivity-temperature-depth (CTD) rosette system (SeaBird  
106 Electronics). Physico-chemical parameters of seawater (conductivity, density, depth, dissolved  
107 oxygen (DO), pH, turbidity, salinity and temperature) were recorded with appropriate sensors  
108 attached to the CTD system.

109 Sampling depths were fixed based on dissolved oxygen (DO) data obtained during CTD  
110 (Table 1) deployment. Water samples for gene abundance were collected from four different  
111 depths at each station; a) subsurface ( $\sim 20$  m in all stations), b) oxycline waters (110–140 m in  
112 AS; 140–210 m in BoB), c) the core of the OMZ (350-390 m in AS; 600-710 m in BoB) and d)  
113 mesopelagic waters ( $\text{O}_2$  conc.  $> 10 \mu\text{M}$ ) ( $> 1,500$  m in AS;  $> 900$  m in BoB). The station names  
114 were indicated by station number (1 to 6), followed by sampled depths (a to d), i.e. '4.d' indicates  
115 mesopelagic water of station 4. The DNA samples (triplicates) for diversity assessment were  
116 collected from the core OMZ of the stations 1 and 6. A nutrient AutoAnalyser (*QUAATRO*;  
117 Bran+Luebbe) was used to measure dissolved concentrations of nitrate ( $\text{NO}_3\text{-N}$ ), nitrite ( $\text{NO}_2\text{-N}$ )  
118 and ammonium ( $\text{NH}_4\text{-N}$ ).

119

### 120 **DNA extraction, qPCR, PCR, cloning and sequencing**

121 Approximately 20 L of seawater were filtered through 0.22- $\mu\text{m}$  polycarbonate membrane  
122 filter paper (47 mm diameter; Millipore), and the polycarbonate membranes were flash-frozen in  
123 liquid nitrogen and stored at  $-80^\circ\text{C}$  until further analysis. The DNA was extracted using the

124 DNeasy kit (Bioserve, India) following the manufacturer's protocols. Concentration and purity  
125 of the genomic DNA were checked with a NanoDrop spectrophotometer (Thermo Scientific  
126 2000/2000c) (Johnson, 1994). The DNA yields ranged from 0.08 to 3.15  $\mu\text{gL}^{-1}$  of seawater  
127 across all samples.

128 Abundance of the archaeal amoA genes was determined using three sets of primers,  
129 targeting 1. total archaeal amoA (amoAt); Arch-amoAF/Arch-amoAR (Francis et al., 2005), 2.  
130 water column A (WCA) ecotypes; Arch-amoAFA & Arch-amoAR (Mosier and Francis 2011)  
131 and 3. water column B (WCB) ecotypes; Arch-amoAFB & Arch-amoAR (Mosier and Francis  
132 2011). The QPCR quantification was carried out as follows: initial denaturation at 95°C for 10  
133 min, followed by 40 cycles of 95°C for 15s and primer annealing at 56°C for 1 min, followed by  
134 detection. All reactions were carried out in triplicate. In this study, for the water column C, the  
135 soil assemblage primer set was not used because in marine systems, amoA gene (WCC)  
136 abundance is low (Francis et al., 2005). For cloning and sequencing, linearized plasmid vectors  
137 were used (TOPO vector, Invitrogen); the plasmids were linearized by the *NotI* restriction  
138 enzyme (DNeasy clean kit, Bioserve, India) and stored at -80°C until future use. The vectors  
139 were freshly diluted prior to the experiments. The WCA and WCB ecotypes were quantified with  
140 identical reaction chemistries as follows: 12.5  $\mu\text{L}$  Taqman Master Mix 2.0 (Bioserve, India), 200  
141 nM of each primer, 300 nM of each probe and 1  $\mu\text{L}$  DNA template per reaction, with a final  
142 volume of 25  $\mu\text{L}$ . Efficiencies for all qPCR assays ranged from 92 to 99% across all samples.

143 For DNA sequencing, replicate DNA extractions (from stations 1 and 6) from three sub-  
144 samples were pooled from each sampling and extracted using the Power Water DNA isolation kit  
145 (MOBio, USA). Archaeal amoA fragments (~635 bp) were amplified using the primers Arch-  
146 amoAF and Arch-amoAR under standard PCR conditions (Beman & Francis, 2006). Each sample  
147 was amplified thrice and pooled to minimise PCR bias; the products were gel-purified and  
148 ligated into pMD19 vectors (Bioserve Biotechnologies, pvt.ltd., India) according to the  
149 manufacturer's instructions. *Escherichia coli* TOP10-competent cells were used for hybrid  
150 vector transformation (Sambrook & Russell, 2001), and recombinants were selected by using X-  
151 Gal-IPTG in Luria-Bertani (LB) indicator plates supplemented with 100 mg ampicillin  $\text{ml}^{-1}$ .  
152 Approximately 390 white colonies were randomly selected from each clone library, and cloned  
153 amoA fragments were re-amplified using the primer pairs M13-D (5'-  
154 AGGGTTTTCCCAGTCACGACG-3') and RV-M (5'-GAGCGGATAACAATTCACACAGG-

155 3'). A later primer pair (RV-M) was used for sequencing with an ABI 3770 automatic sequencer  
156 (Applied BioSystems) at Bioserve Biotechnologies, Pvt. Ltd. (India).

### 157 **DNA sequence analysis: CHIMERA check, phylogeny**

158 The DNA sequences were extracted using ChromasPro (ver. 1.9.9), and the total  
159 sequences were subjected to the *chimera* filter using UCHIME (Edgar et al., 2011). Resultant  
160 non-chimeric sequences were grouped into operational taxonomic units (OTUs) based on a cut-  
161 off value of 95% (Christman et al., 2011). The DNA sequence similarities between two sampling  
162 regions were calculated with Libcompare of the DOTUR program (Schloss & Handelsman,  
163 2005) and aligned using the CLUSTAL\_X program (Thompson et al., 1994). We used total  
164 amoA sequences representing global amoA phylogeny, classified and annotated by Alves et al.  
165 (2018), as a reference file, as it represents a complete picture of amoA phylogeny to date. The  
166 phylogenetic tree was constructed using MEGA X (Kumar et al., 2018) and refined using iTOL  
167 (Letunic and Bork, 2019).

168

### 169 **Statistical analysis**

170 Pairwise distances and nucleotide diversity were calculated within marginal sea  
171 sequences using Kimura-2 parameters in MEGA X (Kumar et al., 2018). The sequence coverage  
172 of the archaeal amoA gene was estimated using a rarefaction curve plotted in 'Fungene', a  
173 functional gene pipeline and repository in the Ribosomal Database Project (RDP) (Cole et al.,  
174 2013). The statistical inference helps to compare the complexities between two or more  
175 communities and the sampling efficiency. Correlations between AOA abundances and  
176 environmental variable in all sampled stations were analysed by canonical correspondence  
177 analysis (CCA) using PAST (Hammer et al., 2001). Shannon diversity index, evenness and  
178 sampling station similarities were plotted in PAST.

179

## 180 **RESULTS**

### 181 **Physiochemical properties**

182 The bathymetry of sampling stations in AS and BoB is provided in Figure 1. Overall, the  
183 average surface temperature was 25°C in both the marginal seas, whereas the oxycline region  
184 showed a different temperature; i.e. the average temperature of the BoB (25°C) was slightly  
185 higher than that of the AS (19.8°C) (Table S1). Overall, the temperature gradient between

186 oxycline and the core of the OMZ was relatively higher in the BoB (~25 and 13.5°C) than in the  
187 AS (~19.8 and 11.5°C) (Table S1). Among the sampling stations, BoB was ~5, 2 and 5°C  
188 warmer than the AS in oxycline, core OMZ and mesopelagic waters, respectively. Sampling  
189 depth ranged from subsurface (~20 m; in all stations) to a maximum of 1,620 m (at mesopelagic  
190 depths of station 3 in AS).

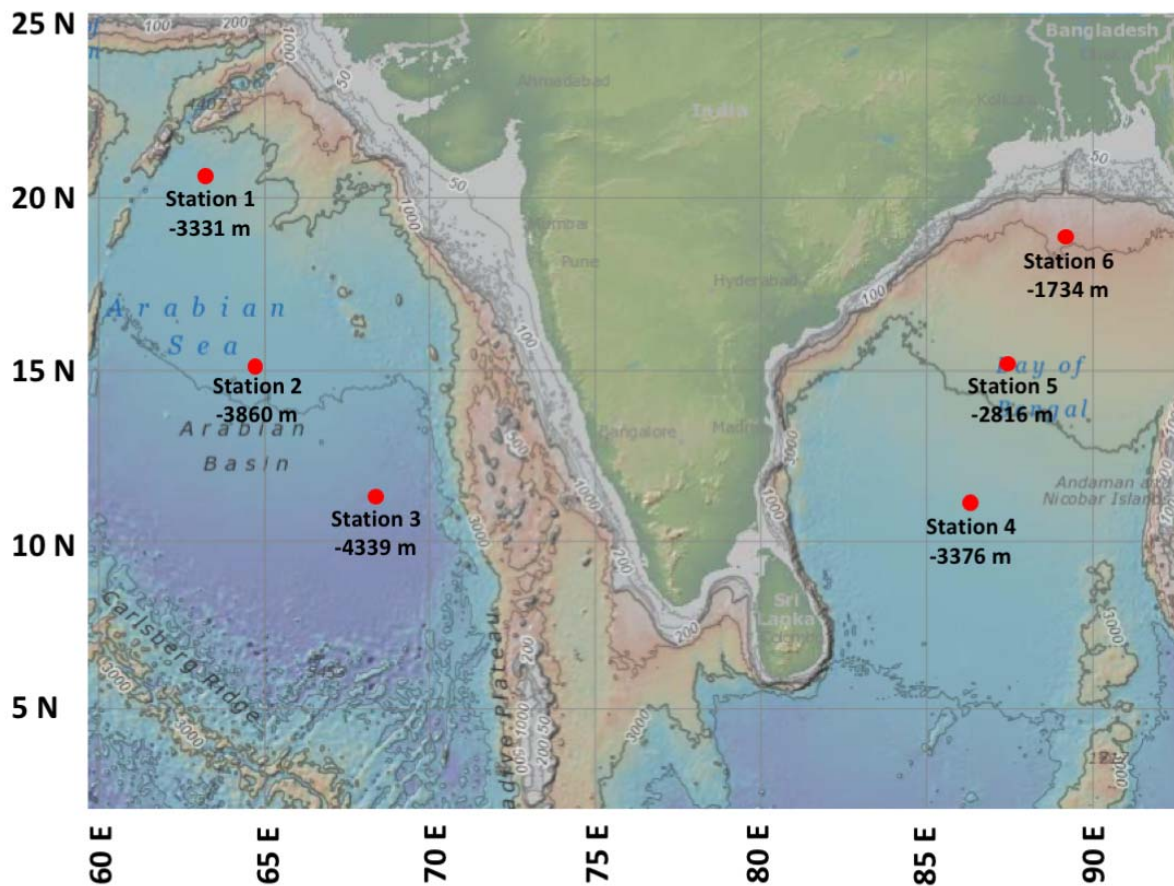

191  
192 **Fig. 1:** Bathymetry map of sampling stations with maximum depths (in meters) in the Arabian  
193 Sea and the Bay of Bengal

194  
195 The core OMZ of the AS was three times stronger (with  $\sim 3 \mu\text{M DL}^{-1}$ ) than that of the  
196 BoB ( $\sim 9 \mu\text{M DL}^{-1}$ ), while nitrite accumulation was 9-fold higher in the BoB (up to  $35 \mu\text{M}$ ) than  
197 in the AS (up to  $3.2 \mu\text{M}$ ) (Fig. 2). The core OMZ of the BoB had a higher ammonia  
198 concentration ( $0.16 \mu\text{M N L}^{-1}$ ) than that of the AS ( $0.12 \mu\text{M N L}^{-1}$ ) Overall, the subsurface  
199 stations of the AS were better oxygenated than that of the BoB, whereas mesopelagic water of

200 the BoB was better oxygenated than that of the AS. Regarding ammonia concentrations, a  
 201 maximum of  $0.2 \mu\text{M N L}^{-1}$  was recorded in subsurface depths of station 2 (AS) and station 4  
 202 (BoB). All mesopelagic depths in both marginal seas had minimum ammonia concentrations,  
 203 with the lowest being observed for station 6 ( $0.01 \mu\text{M N L}^{-1}$ ) in the BoB. (Table S1).  
 204

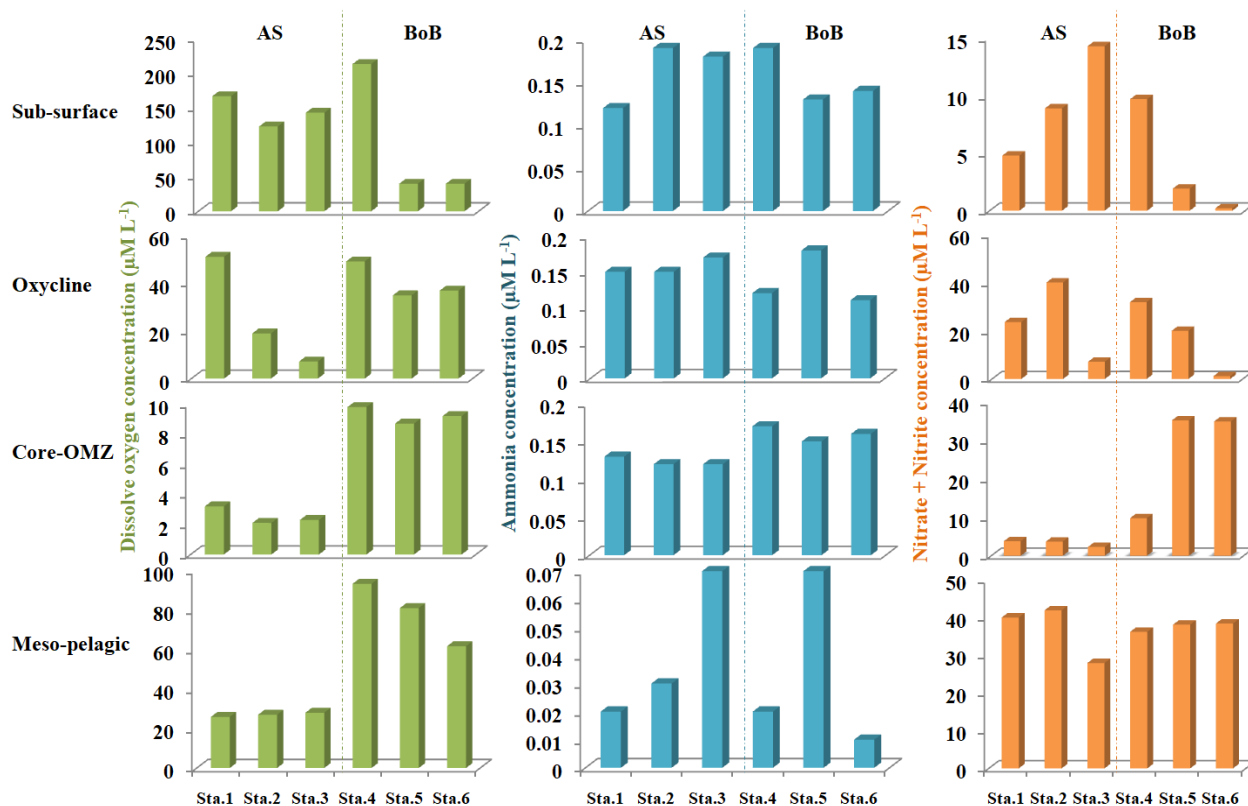

205  
 206 **Fig. 2:** Depth profiles of dissolved oxygen, nitrite + nitrate and ammonia concentrations at the  
 207 six sampled stations. Station numbers are indicated by numbers 1-6, and sampled depths are  
 208 indicated by 'a to d'.  
 209

### 210 Variations in AoA amoA gene abundances in AS and BoB

211 The WCA and WCB ecotypes were detected in all stations and were more abundant in  
 212 the AS (in the order of  $10^6$  and  $10^7$  gene copies  $\text{L}^{-1}$ , respectively) than in the BoB (in the order of  
 213  $10^4$  and  $10^6$  gene copies  $\text{L}^{-1}$ , respectively) (Fig. 3, Table S2). In AS stations, a high abundance of  
 214 WCA ecotypes ( $1.9 \times 10^7$  copies) was observed in the core OMZ (station 1), whereas a minimum  
 215 of 22 copies were recorded in mesopelagic depths of the same station. In the case of BoB  
 216 stations, a maximum of  $2.7 \times 10^5$  gene copies of WCA was recorded in subsurface waters of



217 station 6 and a minimum of near-detection limit (7 copies L<sup>-1</sup>) was recorded in mesopelagic  
 218 waters of station 5. However, in both marginal seas, amoAt copy numbers were in the order of  
 219 10<sup>7</sup> copies L<sup>-1</sup>, indicating that the two marginal seas contain similar densities of AOA but of a  
 220 different species composition, as the WCA/WCB primer used picked up different densities of  
 221 amoA copy numbers at different depths among the stations (Fig. 3, Table S2). Among all  
 222 stations, the abundance trend of amoAt copy numbers followed the order subsurface < oxycline  
 223 > core OMZ < meso-pelagic waters. In all subsurface stations of the AS, WCA ecotype amoA  
 224 copy numbers were high (~10<sup>5</sup>), and the numbers decreased in the oxycline layers, followed by a  
 225 sharp increase to reach the maximum in the core OMZ (~10<sup>6</sup>) and a sharp decline in the  
 226 mesopelagic depths (10<sup>2</sup>). Generally, the WCB ecotypes were lowest in subsurface waters and  
 227 highest in the core OMZ of the AS (10<sup>7</sup> copies L<sup>-1</sup>), followed by a decline (10-fold) in  
 228 mesopelagic depths. Such observational trends were common globally, but such trends were  
 229 steeper in BoB stations where the decline is 100 fold lesser in mesopelagic depths.  
 230

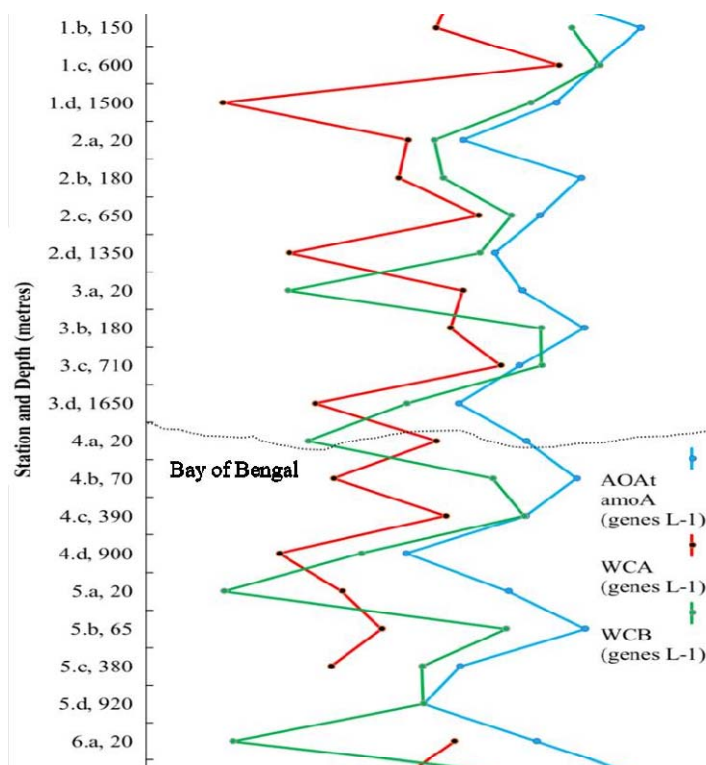

231  
 232 **Fig. 3** Abundance of total archaeal amoA (amoAt), water column A (WCA) and water column B  
 233 (WCB) ecotypes. Sampled stations (1, 2, 3, 4, 5, 6), depth profile (a = surface waters; b =

234 oxycline waters; c = core oxygen minimum waters and d = mesopelagic waters) along with depth  
 235 (in meters) are provided on the x axis and amoA gene copy numbers on the y axis.

236

237 **AOA amoA abundance in core OMZs (AS vs. BoB)**

238 The AoA amoAt and WCB-amoA gene copies clearly dominated throughout the core  
 239 OMZ (Fig. 4). The WCA-amoA, WCB-amoA and amoAt gene copies were 90, 23 and 7.5 times  
 240 higher in the AS than in the BoB (Fig. S3, Table S2).

241

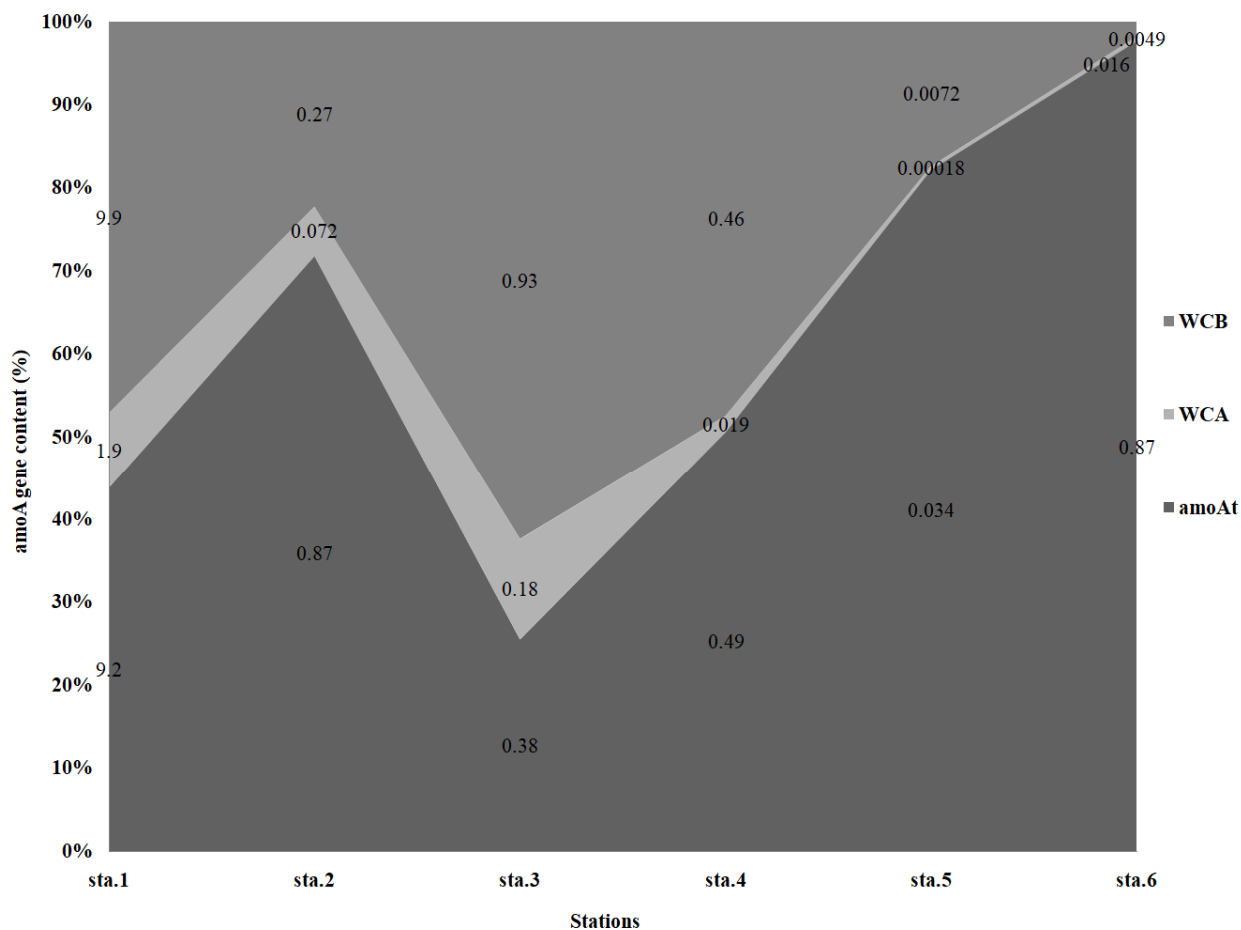

242

243 **Fig. 4:** Percentage compositions and abundances of amoAt, WCA and WCB amoA gene copies  
 244 in the core OMZ of the AS (sta. 1, 2 & 3) and the BoB (sta. 4, 5 & 6). Numbers inside the plot  
 245 represent gene copy numbers (x 10<sup>7</sup>) per litre of the samples of the corresponding stations.

246 Among the stations, WCA-amoA, WCB-amoA and amoAt were more abundant in the  
 247 AS station 1(9.2, 1.9 and 9.9 (x 10<sup>7</sup> copies L<sup>-1</sup>), respectively) than in the BoB station 6 (8.7 x 10<sup>6</sup>

248 copies L<sup>-1</sup>), justifying the selection of these stations (sta. 1 & sta. 6) for sequencing studies.  
249 Surprisingly, WCB amoA copies outnumbered amoAt copies in station 1 (9.9 x 10<sup>7</sup> copies L<sup>-1</sup>)  
250 (Fig. S3), leading us to infer question whether the actual value represents a true phenomenon in a  
251 sampled station, qPCR contamination during experimentation or the inability of the used amoAt  
252 primer to capture entire AOA amoA gene copies. Also, in station 1, we recorded a higher  
253 abundance of WCA-amoA gene copies (1.9 x 10<sup>7</sup> copies L<sup>-1</sup>) when compared to the other  
254 stations. Regarding the WCA, WCB and amoAt copy numbers, the AS contained 13 times more  
255 amoA copies than the BoB.

256

### 257 **Influences of environmental parameters on WCA, WCB and amoAt gene copies**

258 The WCA amoA abundance and ammonia concentration were positively correlated, while  
259 WCA was partially negatively correlated with sampling depth (Fig. S2), We also found a partial  
260 negative correlation between abundance of WCB ecotypes and dissolved oxygen concentration,  
261 explaining its relatively lower abundances in mesopelagic waters below the OMZs of both  
262 marginal Seas (Fig. 5, S2); amoAt abundance was positively correlated with WCA ecotype.

263 Not more than 40% variations were explained by combining both axes in the CCA plot,  
264 indicating that factors responsible for shaping the community variation were not included in the  
265 present study (Fig. 5). Among the environmental and biological parameters, subsurface samples,  
266 station 3 (AS) and station 4 (BoB) were highly (> 95%) similar (Fig. 5). Among oxycline  
267 samples, station 1 (AS) and 6 (BoB) and stations 4 and 5 (BoB) were highly similar. Regarding  
268 the OMZ layers, station 2 (AS) and 4 (BoB) were relatively more similar to each other compared  
269 with station 3 (AS) (Fig. 5). Overall, amoAt showed higher Shannon diversity and evenness  
270 values in the stations, and alpha diversity followed the order WCB > WCA > amot (Fig. 5).

271

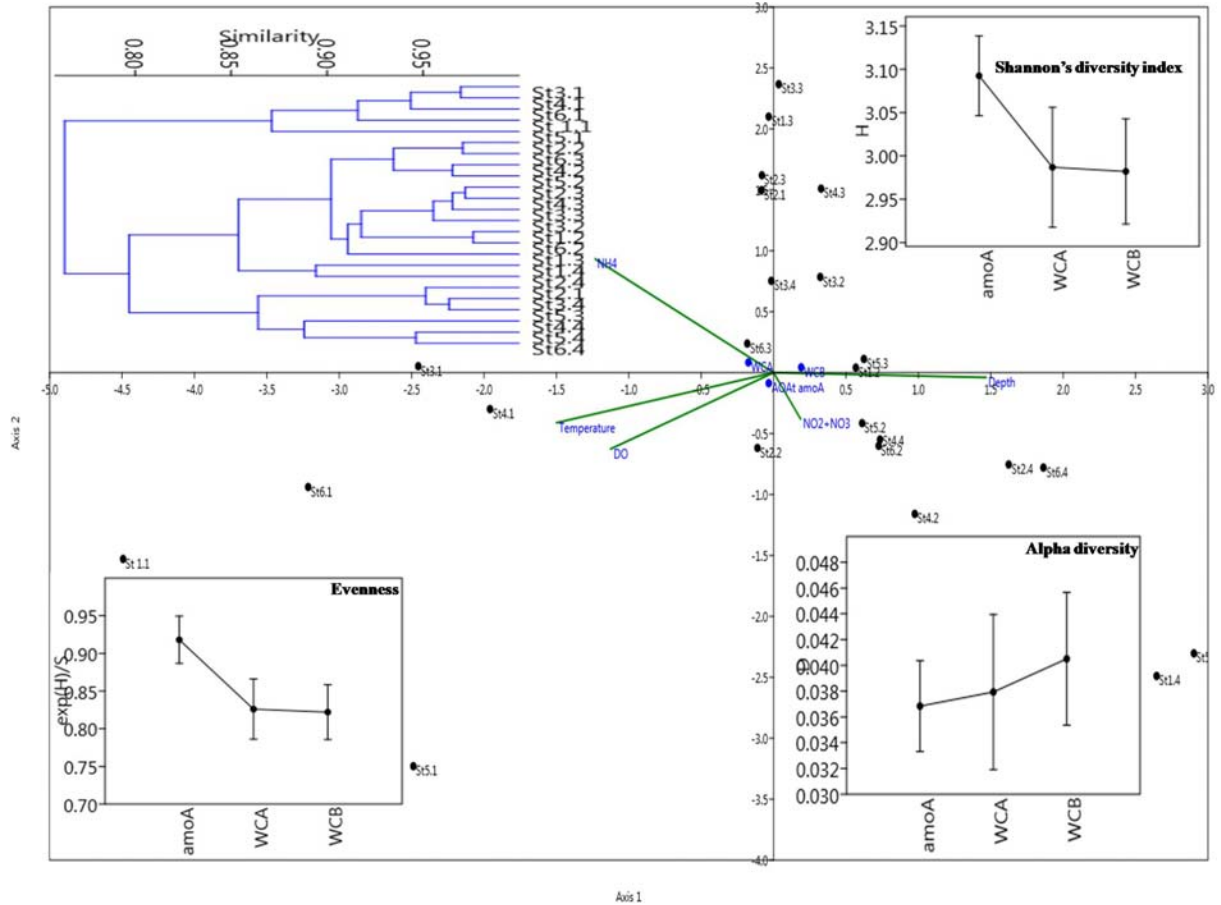

272  
 273 **Fig. 5:** CCA plot describing relationships between physicochemical and biological parameters  
 274 within sampling stations, along with diversity indices.

275  
 276 **AOA phylogenetic diversity**

277 We sequenced 390 amoA genes from the AS and the BoB, of which 22 sequences were  
 278 chimeric (5.6% of total sequences); 190 amoA (AS) and 178 (BoB) sequences were included in  
 279 further analyses. Clustering analysis grouped the sequences into 45 OTUs, of which 19 were  
 280 from the AS and 26 from the BoB. The phylogram constructed using the global reference file of  
 281 Alves et al. (2018) and the representative OUT sequences from the present study revealed that all  
 282 OTUs belong to two main classes, viz; Nitrosopumilales (NP) and Ca. Nitrosotaleales (NT) (Fig.  
 283 6). Members of NP were segregated into alpha (NP- $\alpha$ ), gamma (NP- $\gamma$ ), delta (NP- $\delta$ ) and epsilon  
 284 (NP- $\epsilon$ ) clades, whereas the members of NS were segregated into alpha (NS- $\alpha$ ), beta (NS- $\beta$ ),  
 285 gamma (NS- $\gamma$ ) and epsilon (NS- $\epsilon$ ) clades. Sequences from the BoB had representatives in all  
 286 clades, whereas sequences of the AS were represented only in NP- $\alpha$ , NP- $\gamma$  and NP- $\delta$  clades.

287 Even with limited representation in NP clades, *amoA* sequences of AS constituted 65 and 85% of  
288 total OTUs in NP- $\alpha$  and NP- $\delta$  clades, respectively. Even from the global reference file of Alves  
289 et al. (2018), one representative OUT in the NS- $\gamma$  clade could not be grouped (Fig. 6). We found  
290 that Alves et al. (2018) have identified seven of the sequences (published in GenBank) from the  
291 present study to define the global phylogeny, consisting of clades NP- $\gamma$ -2.2\_Incertae, NP- $\gamma$ -  
292 2.2.4.1\_OTU1, NP- $\delta$ -1\_OTU11, NP- $\delta$ -1.2\_OTU1, NS- $\beta$ -2\_OTU3, NS- $\gamma$ -2.2.3\_OTU2 and NS- $\epsilon$ -  
293 1\_OTU1 (Fig. 6). The respective GenBank accession numbers of those sequences were  
294 JN190774, JN190815, JN190788, JN190644, JN190707, JN190852 and JN190828, respectively.  
295 Among the unique representatives of global phylogeny identified in the present study, *amoA*  
296 sequences of the AS were represented only in the NP- $\delta$ -1.2\_OTU1 clade, whereas the remaining  
297 ones (six) were occupied by BoB *amoA* sequences.

298 The overall pair-wise nucleotide distance data revealed that *amoA* sequences of the BoB  
299 (0.28) were 2.3 times more abundant than those of the AS (0.12), which is surprising given the  
300 overall dominance of AS in *amoA* gene copies. The nucleotide diversity index ( $\pi$ ) of the BoB  
301 (0.23) was two times higher than that of the AS (0.11). Overall, the core OMZ region of the BoB  
302 contained twofold diverse *amoA* gene copies compared to that of the AS, posing the question  
303 whether a weaker OMZ promotes a higher AOA species diversity (based on the BoB scenario) or  
304 whether reduced oxygen levels reduce the Thaumarcheota population? (based on the AS  
305 scenario). A rarefaction curve as generated to analyse the depth of the sampling site, indicating  
306 cut-off at 95% (Fig. S1). The BLAST analysis revealed that all sequences were matched with  
307 unculturable *amoA* sequences produced elsewhere from diverse environments, including marine  
308 and coastal/wetlands (Table S4). The sequences generated from the present study were added to  
309 GenBank under the accession numbers JN190498-JN190865.

## 310 **DISCUSSION**

311 Sampling two marine systems consecutively in the same season for comparison of  
312 biological data was a difficult task and required considerable planning. The *amoA* gene has been  
313 extensively used to estimate the abundance and diversity of AOA and has provided evidence for  
314 their high phylogenetic diversity in natural environments (Prosser and Nicol, 2012). The present  
315 study documented *amoA* abundances and diversity in AS and BoB in the same cruise track.  
316 Among the stations in the AS, *amoA* abundances were one- to two-fold higher compared to the

317 values found in a previous study in nearby sampling sites (Newell et al., 2011) and in the  
 318 Atlantic Ocean (Wuchter et al., 2006).

319

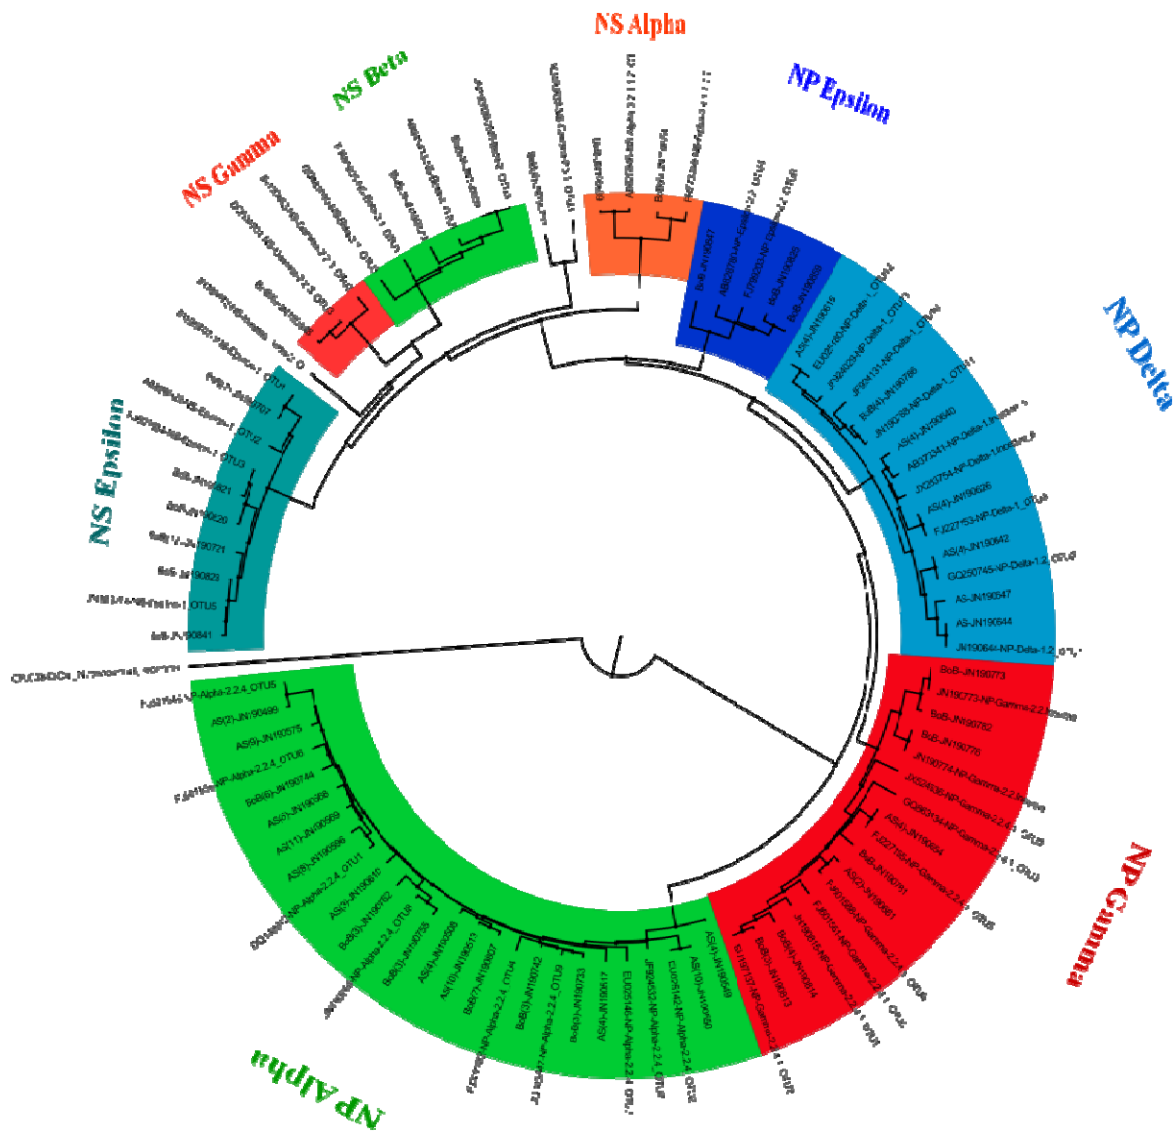

320  
 321 **Fig. 6:** AoA *amoA* phylogeny retrieved from the core OMZ of the Arabian Sea and the the Bay  
 322 of Bengal.

323  
 324 The *amoA* copies of WCA, WCB and *amoAt* were detected in all depths and stations,  
 325 similar to observations made in North Eastern Pacific waters (Smith et al., 2015). However,  
 326 unlike in North Pacific waters, where *amoA* abundances ranged between  $10^3$  and  $10^6$  copies per  
 327 litre, AS/BoB contained highly variable abundances among the sampling stations (*amoAt* copies

328 between  $10^1$  and  $10^8$  copies per litre), which may be due to the geographically larger sampling  
329 area and the multiple depth profiles (four depths) per station. In this study, the patterns of  
330 high abundance of *amoA* copies, concentrated from oxycline to core OMZ depths and  
331 decreasing in mesopelagic waters, resembles with the patterns of North Pacific waters (Smith et  
332 al., 2015).

333 Also, the patterns of WCA, being one order less abundant in both marginal seas, and of  
334 WCB, being highly variable along the depths, were similar to North Pacific waters (Smith et al.,  
335 2015). Our data support the previous hypothesis that WCA can adhere to relatively higher  
336 concentrations of ammonia than WCB. This is also supported by a positive correlation between  
337 WCA and ammonia concentration. Apart from depth, ammonia concentration appears to shape  
338 the WCA/WCB ecotypes in AS/BoB, as the variable concentrations of ammonia drive AOA  
339 diversity (Sintes et al., 2013). Also, the positive correlation observed between WCB and *amoA*  
340 copy numbers in both marginal seas implies that WCB could be a dominant community among  
341 the total AOA populations (especially in station 1 of the AS) (Hansman et al., 2009).

342 The 16S rRNA and *amoA* gene of AOA were interchangeably used in phylogenies, as  
343 both the topologies of the trees were similar with higher taxonomic resolution (Nicol et al.,  
344 2008). To assess environmental patterns and global AOA distribution, Alves et al. (2018) used  
345 33,378 *amoA* sequences of AOA and found that the global phylogenetic distribution of AOA  
346 contains four major clades, viz., 1. Ca. Nitrosocaldales (NC), Nitrososphaerales (NS), Ca.  
347 Nitrosotaleales (NT), Nitrosopumilales (NP) and a minor clade named NT/NP-Incertaesedis  
348 (NT/NPIS). These clades, grouped in the level of classes, were further subdivided into sub-clades  
349 as alpha, beta, gamma, etc., and the sub-clades were furthermore divided based on a number of  
350 representative OTUs in the group (1.1, 1.2, etc.). All *amoA* sequences from both marginal seas  
351 represented one group in NP (77.8%) and NS (22.2%). Members of NP were segregated into  
352 alpha (NP- $\alpha$ ), gamma (NP- $\gamma$ ), delta (NP- $\delta$ ) and epsilon (NP- $\epsilon$ ) clades, whereas the members of  
353 NS were segregated into alpha (NS- $\alpha$ ), beta (NS- $\beta$ ), gamma (NS- $\gamma$ ) and epsilon (NS- $\epsilon$ ) clades.

354 Spurious AOA from lineage NS have also been found in marine sediments (Alves et al.,  
355 2018); in the present study, one representative OTU in NS- $\gamma$  clade did not group together.  
356 Globally, 84% of NS- $\gamma$  are most specifically associated with soils-sediments (Alves et al., 2018).  
357 Hence, regarding the origin of representative OTUs in the present study, it is unclear whether  
358 they represent thriving organisms or dormant/dead cells transported from the land.

359           Although NP- $\alpha$  and NP- $\epsilon$  OTUs were dominant among the NP clade, globally, only 45%  
360 of lineage NP were actually detected in unambiguously marine environments (Alves et al.,  
361 2018). Overall, the majority of NS and NP members represented from the AS and the BoB was  
362 globally recognised to occur in marine systems, among which the AOA of the BoB were more  
363 diverse than those of the AS.

364           Using the sequences described in Alves et al., (2018), we found that seven OTUs were  
365 represented in global phylogeny, where the AOA of the BoB contributed six different OTUs.  
366 These seven OTUs were clade representatives, viz.; NP- $\gamma$ -2.2\_Incertae, NP- $\gamma$ -2.2.4.1\_OTU1,  
367 NP- $\delta$ -1\_OTU11, NP- $\delta$ -1.2\_OTU1, NS- $\beta$ -2\_OTU3, NS- $\gamma$ -2.2.3\_OTU2 and NS- $\epsilon$ -1\_OTU1BoB  
368 were unique OTUs, which has been recovered by stringent chimeric screening and multiple re-  
369 drawn phylograms (Alves et al., 2018).

370           Another interesting phenomenon is the absence of AS amoA sequences in the NS clade.  
371 Further studies should therefore investigate the drivers of amoA diversity in both marginal seas,  
372 as they seem to incubate different amoA populations. Even though the factors driving these  
373 OMZ-specific amoA communities were unclear in the present study, when comparing the AS  
374 with the BoB, containing nano-molar concentrations of O<sub>2</sub> in the OMZ, which inhibit stable  
375 accumulation of nitrite (Bristow et al., 2016), differences in adiabatic factors (Prasanna Kumat  
376 et al., 2002) cannot be ruled out.

377           Peng et al. (2013) conclude that the AOA community in OMZs of the AS is significantly  
378 different from that of the Eastern Tropical South Pacific, and such differences were due to  
379 geographic factors rather than environmental parameters. Although our results do not agree with  
380 previous findings, as AOA amoA populations in geographically closer OMZs are genetically  
381 distinct, differences in the depths of the OMZs in both marginal seas could be a potential factor.  
382 Also, the subsurface temperature in the BoB was higher than that in the AS, and according to  
383 previous findings, a 1.5-2°C higher temperature in the BoB compared to the AS leads to strong  
384 stratified surface layer in the BoB, limiting the mixing of nutrients from below the surface layer  
385 (Prasanna Kumar et al., 2002). However, in changing OMZ boundaries of global ocean  
386 (Stramma et al., 2011), the threshold of resistance of the BoB is unknown.

387

388 **Conclusions**



389 Although Sangar's sequencing has a high power in amplicon length recovery, thereby revealing  
390 more information per DNA sequence, the quantity of data provided by Illumina sequencing is  
391 unmatched. As unique clades were discovered by Sangar's sequencing in the present study,  
392 further studies with next-gen sequencing platforms are needed to investigate the differences  
393 between the AS and the BoB in terms of the AOA population. The AOA of the BoB contained  
394 twofold diverse amoA gene copies compared to the AS, posing the questions whether a weaker  
395 OMZ promotes a richer AOA diversity or whether lower oxygen levels reduce the  
396 Thaumarcheota population.

### 397 **Acknowledgement**

398 Authors thank the Department of Biotechnology, Ministry of Science and Technology,  
399 Government of India for the financial assistance provided through INSPIRE fellowship  
400 (IF10431) and China Postdoctoral Science Foundation, China, for financial assistance provided  
401 through National Postdoctoral Fellowship (Ref.: 0050-K83008).

402

### 403 **References**

- 404 1. Agogue, H., Brink, M., Dinasquet, J., and Herndl, G. J. (2008). Major gradients in  
405 putatively nitrifying and non-nitrifying Archaea in the deep North Atlantic. *Nature* 456,  
406 788–791. doi: 10.1038/nature07535
- 407 2. Al Azhar, M., Lachkar, Z., Lévy, M., & Smith, S. (2017). Oxygen Minimum Zone  
408 Contrasts Between the Arabian Sea and the Bay of Bengal Implied by Differences in  
409 Remineralization Depth. *Geophysical Research Letters*, 44(21), 11,106-11,114.  
410 <https://doi.org/10.1002/2017gl075157>
- 411 3. Alves, R. J. E., Minh, B. Q., Urich, T., von Haeseler, A., & Schleper, C. (2018). Unifying  
412 the global phylogeny and environmental distribution of ammonia-oxidising archaea based  
413 on amoA genes. *Nature Communications*, 9(1). [https://doi.org/10.1038/s41467-018-](https://doi.org/10.1038/s41467-018-03861-1)  
414 [03861-1](https://doi.org/10.1038/s41467-018-03861-1)
- 415 4. Beman, J. M., Popp, B. N., and Francis, C. A. (2008). Molecular and biogeochemical  
416 evidence for ammonia oxidation by marine Crenarchaeota in the Gulf of California.  
417 *ISME J.* 2, 429–441. doi: 10.1038/ismej.2007.118
- 418 5. Biller, S. J., Mosier, A. C., Wells, G. F. & Francis, C. A. Global biodiversity of aquatic  
419 ammonia-oxidizing archaea is partitioned by habitat. *Front. Microbiol.* 3, 252 (2012).

- 420 6. Bristow, L. A., Callbeck, C. M., Larsen, M., Altabet, M. A., Dekaezemacker, J., Forth,  
421 M., ... Canfield, D. E. (2016). N<sub>2</sub> production rates limited by nitrite availability in the  
422 Bay of Bengal oxygen minimum zone. *Nature Geoscience*, 10(1), 24–29.  
423 <https://doi.org/10.1038/ngeo2847>
- 424 7. Cao, H., Auguet, J.-C. & Gu, J.-D. Global ecological pattern of ammonia oxidizing  
425 archaea. *PLoS One* 8, e52853 (2013).
- 426 8. Christman, G. D., Cottrell, M. T., Popp, B. N., Gier, E., & Kirchman, D. L. (2011).  
427 Abundance, Diversity, and Activity of Ammonia-Oxidizing Prokaryotes in the Coastal  
428 Arctic Ocean in Summer and Winter. *Applied and Environmental Microbiology*, 77(6),  
429 2026–2034. <https://doi.org/10.1128/aem.01907-10>
- 430 9. Cole, J. R., Wang, Q., Fish, J. A., Chai, B., McGarrell, D. M., Sun, Y., ... Tiedje, J. M.  
431 (2013). Ribosomal Database Project: data and tools for high throughput rRNA analysis.  
432 *Nucleic Acids Research*, 42(D1), D633–D642. <https://doi.org/10.1093/nar/gkt1244>
- 433 10. Edgar, R. C., Haas, B. J., Clemente, J. C., Quince, C., & Knight, R. (2011). UCHIME  
434 improves sensitivity and speed of chimera detection. *Bioinformatics*, 27(16), 2194–2200.  
435 <https://doi.org/10.1093/bioinformatics/btr381>
- 436 11. Falkowski PG, et al. (2011) Ocean deoxygenation: Past, present, and future. *Eos Trans*  
437 *AGU* 92(46):409–410.
- 438 12. Francis, C. A., Roberts, K. J., Beman, J. M., Santoro, A. E. & Oakley, B. B. Ubiquity and  
439 diversity of ammonia-oxidizing archaea in water columns and sediments of the ocean.  
440 *Proc. Natl. Acad. Sci. USA* 102, 14683–14688 (2005).
- 441 13. Hallam SJ, et al. (2006) Pathways of carbon assimilation and ammonia oxidation  
442 suggested by environmental genomic analyses of marine Crenarchaeota. *PLoS Biol*  
443 4(4):e95.
- 444 14. Hansman, R. L. et al. The radiocarbon signature of microorganisms in the mesopelagic  
445 ocean. *Proc. Natl. Acad. Sci. USA* 106, 6513–6518 (2009).
- 446 15. Hansman, R. L., S. Griffin, J. T. Watson, E. R. M. Druffel, A.E. Ingalls, A. Pearson, and  
447 L. I. Aluwihare. 2009. The radiocarbon signature of microorganisms in the  
448 mesopelagic ocean. *Proc. Natl. Acad. Sci. USA* 106: 6513–6518.  
449 [doi:10.1073/pnas.0810871106](https://doi.org/10.1073/pnas.0810871106)

- 450 16. Hammer, Ø., Harper, D.A.T., Ryan, P.D. 2001. PAST: Paleontological statistics software  
451 package for education and data analysis. *Palaeontologia Electronica* 4(1):  
452 9pp. [http://palaeo-electronica.org/2001\\_1/past/issue1\\_01.html](http://palaeo-electronica.org/2001_1/past/issue1_01.html)
- 453 17. Hawley, A. K., Brewer, H. M., Norbeck, A. D., Pa a-Toli , L., & Hallam, S. J. (2014).  
454 Metaproteomics reveals differential modes of metabolic coupling among ubiquitous  
455 oxygen minimum zone microbes. *Proceedings of the National Academy of Sciences*,  
456 111(31), 11395–11400. <https://doi.org/10.1073/pnas.1322132111>
- 457 18. Heal, K. R. et al. Two distinct pools of B12 analogs reveal community interdependencies  
458 in the ocean. *Proc. Natl. Acad. Sci. USA* 114, 201608462 (2016).
- 459 19. Ittekkot, V., Nair, R.R., Honjo, S., Ramaswamy, V., Bartsch, M., Manganini, S., Desai,  
460 B.N., 1991. Enhanced particle fluxes in the Bay of Bengal induced by injection of  
461 freshwater. *Nature* 351, 385–387.
- 462 20. Johnson, K. S., Riser, S. C., & Ravichandran, M. (2019). Oxygen Variability Controls  
463 Denitrification in the Bay of Bengal Oxygen Minimum Zone. *Geophysical Research*  
464 *Letters*, 46(2), 804–811. <https://doi.org/10.1029/2018gl079881>
- 465 21. Kumar S., Stecher G., Li M., Knyaz C., and Tamura K. (2018). MEGA X: Molecular  
466 Evolutionary Genetics Analysis across computing platforms. *Molecular Biology and*  
467 *Evolution* 35:1547-1549
- 468 22. Lam, P., Lavik, G., Jensen, M. M., van de Vossenber, J., Schmid, M., Woebken, D., et  
469 al. (2009). Revising the nitrogen cycle in the Peruvian oxygen minimum zone. *Proc. Natl.*  
470 *Acad. Sci. U.S.A.* 106, 4752–4757. doi: 10.1073/pnas.0812444106
- 471 23. Letunic, I., & Bork, P. (2019). Interactive Tree Of Life (iTOL) v4: recent updates and  
472 new developments. *Nucleic Acids Research*, 47(W1), W256–W259.  
473 <https://doi.org/10.1093/nar/gkz239>
- 474 24. McCreary, J.P., You, Z., Hood, R.R., Vinayachandran, P.N., Furue, R., Ishida, A.,  
475 Richards, K.J., 2013. Dynamics of the Indian-Ocean oxygen minimum zones. *Prog.*  
476 *Oceanogr.* 112–113, 15–37.
- 477 25. Metcalf, W. W. et al. Synthesis of methylphosphonic acid by marine microbes: a source  
478 for methane in the aerobic ocean. *Science* 337, 1104–1107 (2012).
- 479 26. Mincer, T. J., Church, M. J., Taylor, L. T., Preston, C., Karl, D. M., and DeLong, E. F.  
480 (2007). Quantitative distribution of presumptive archaeal and bacterial nitrifiers in

- 481 Monterey Bay and the NorthPacific Subtropical Gyre. *Environ. Microbiol.* 9, 1162–1175.  
482 doi: 10.1111/j.1462-2920.2007.01239.x
- 483 27. Naqvi, S.W.A., Jayakumar, D.A., Nair, M., Kumar, M.D., George, M.D., 1994. Ntrous  
484 oxide in the western Bay of Bengal. *Mar. Chem.* 47, 269–278.
- 485 28. Newell, S. E. Babbin, A. R., Jayakumar, A., and Ward, B. B. (2011). Ammonia oxidation  
486 rates and nitrification in the Arabian Sea. *Global Biogeochem. Cycle* 25:GB4016. doi:  
487 10.1029/2010GB003940
- 488 29. Newell, S. E., Babbin, A. R., Jayakumar, A., & Ward, B. B. (2011). Ammonia oxidation  
489 rates and nitrification in the Arabian Sea. *Global Biogeochemical Cycles*, 25(4), n/a-n/a.  
490 <https://doi.org/10.1029/2010gb003940>
- 491 30. Nicol, G. W., Leininger, S., Schleper, C., & Prosser, J. I. (2008). The influence of soil pH  
492 on the diversity, abundance and transcriptional activity of ammonia oxidizing archaea  
493 and bacteria. *Environmental Microbiology*, 10(11), 2966–2978.  
494 <https://doi.org/10.1111/j.1462-2920.2008.01701.x>
- 495 31. Paulmier A, Ruiz-Pino D (2009) Oxygen minimum zones (OMZs) in the modern ocean.  
496 *ProgOceanogr* 80(3-4):113–128.
- 497 32. Peng, X., Jayakumar, A., & Ward, B. B. (2013). Community composition of ammonia-  
498 oxidizing archaea from surface and anoxic depths of oceanic oxygen minimum zones.  
499 *Frontiers in Microbiology*, 4. <https://doi.org/10.3389/fmicb.2013.00177>
- 500 33. Peng, X., Jayakumar, A., & Ward, B. B. (2013). Community composition of ammonia-  
501 oxidizing archaea from surface and anoxic depths of oceanic oxygen minimum zones.  
502 *Frontiers in Microbiology*, 4. <https://doi.org/10.3389/fmicb.2013.00177>
- 503 34. Pitcher, A., Villanueva, L., Hopmans, E. C., Schouten, S., Reichart, G., and Damste, J. S.  
504 S. (2011). Niche segregation of ammonia-oxidizing archaea and anammox bacteria in the  
505 Arabian Sea oxygen minimum zone. *ISME J.* 5, 1896–1904. doi: 10.1038/ismej.2011.60
- 506 35. Prasanna Kumar, S., Muraleedharan, P. M., Prasad, T. G., Gauns, M., Ramaiah, N., de  
507 Souza, S. N., ...Madhupratap, M. (2002). Why is the Bay of Bengal less productive  
508 during summer monsoon compared to the Arabian Sea? *Geophysical Research Letters*,  
509 29(24), 88-1-88–4. <https://doi.org/10.1029/2002gl016013>
- 510 36. Prasanna Kumar, S., Muraleedharan, P. M., Prasad, T. G., Gauns, M., Ramaiah, N., de  
511 Souza, S. N., ...Madhupratap, M. (2002). Why is the Bay of Bengal less productive

- 512 during summer monsoon compared to the Arabian Sea? *Geophysical Research Letters*,  
513 29(24), 88-1-88–4. <https://doi.org/10.1029/2002gl016013>
- 514 37. Prosser JI, Nicol GW. Archaeal and bacterial ammonia oxidisers in soil: the quest for  
515 niche specialisation and differentiation. *Trends Microbiol.* 2012;20:523–31.
- 516 38. Rao, C.K., Naqvi, S.W.A., Kumar, M.D., Varaprasad, S.J.D., Jayakumar, D.A., George,  
517 M.D., Singbal, S.Y.S., 1994. Hydrochemistry of the Bay of Bengal: possible reasons for a  
518 different water-column cycling of carbon and nitrogen from the Arabian Sea. *Mar. Chem.*  
519 47, 279–290.
- 520 39. Restrepo-Ortiz, C. X., Auguet, J.-C. & Casamayor, E. O. Targeting spatiotemporal  
521 dynamics of planktonic SAGMGC-1 and segregation of ammonia-oxidizing  
522 thaumarchaeota ecotypes by newly designed primers and quantitative polymerase chain  
523 reaction. *Environ. Microbiol.* 16, 689–700 (2014).
- 524 40. Santoro, A. E., Casciotti, K. L., and Francis, C. A. (2010). Activity, abundance and  
525 diversity of nitrifying archaea and bacteria in the central California Current. *Environ.*  
526 *Microbiol.* 12, 1989–2006. doi: 10.1111/j.1462-2920.2010.02205.x
- 527 41. Sintes, E., Bergauer, K., De Corte, D., Yokokawa, T. & Herndl, G. J. Archaeal amoA  
528 gene diversity points to distinct biogeography of ammonia-oxidizing Crenarchaeota in the  
529 ocean. *Environ. Microbiol.* 15, 1647–1658 (2013).
- 530 42. Smith, J. M., Damashek, J., Chavez, F. P., & Francis, C. A. (2015). Factors influencing  
531 nitrification rates and the abundance and transcriptional activity of ammonia-oxidizing  
532 microorganisms in the dark northeast Pacific Ocean. *Limnology and Oceanography*,  
533 61(2), 596–609. <https://doi.org/10.1002/lno.10235>
- 534 43. Stahl, D. A. & de la Torre, J. R. Physiology and diversity of ammonia-oxidizing archaea.  
535 *Annu. Rev. Microbiol.* 66, 83–101 (2012).
- 536 44. Stramma, L., Prince, E. D., Schmidtko, S., Luo, J., Hoolihan, J. P., Visbeck, M.,  
537 ...Körtzinger, A. (2011). Expansion of oxygen minimum zones may reduce available  
538 habitat for tropical pelagic fishes. *Nature Climate Change*, 2(1), 33–37.  
539 <https://doi.org/10.1038/nclimate1304>
- 540 45. Techtman, S. M., Mahmoudi, N., Whitt, K. T., Campa, M. F., Fortney, J. L., Joyner, D.  
541 C., & Hazen, T. C. (2017). Comparison of Thaumarchaeotal populations from four deep  
542 sea basins. *FEMS Microbiology Ecology*, 93(11). <https://doi.org/10.1093/femsec/fix128>

- 543 46. Walker CB, et al. (2010) Nitrosopumilusmaritimus genome reveals unique mechanisms  
544 for nitrification and autotrophy in globally distributed marine crenarchaea. Proc Natl  
545 AcadSci USA 107(19):8818–8823.
- 546 47. Walsh DA, et al. (2009) Metagenome of a versatile chemolithoautotroph from expanding  
547 oceanic dead zones. Science 326(5952):578–582.
- 548 48. Whitney F, Freeland H, Robert M (2007) Persistently declining oxygen levels in the  
549 interior waters of the eastern subarctic Pacific. ProgOceanogr 75(2):179–199.
- 550 49. Wright JJ, Konwar KM, Hallam SJ (2012) Microbial ecology of expanding oxygen  
551 minimum zones. Nat Rev Microbiol 10(6):381–394.
- 552 50. Wuchter, C., Abbas, B., Coolen, M. J. L., Herfort, L., van Bleijswijk, J., Timmers, P., et  
553 al. (2006). Archaeal nitrification in the ocean. Proc. Natl. Acad. Sci. U.S.A. 103, 12317–  
554 12322. doi: 10.1073/pnas.0600756103
- 555 51. Wuchter, C., Abbas, B., Coolen, M. J. L., Herfort, L., van Bleijswijk, J., Timmers, P.,  
556 ...SinningheDamste, J. S. (2006). Archaeal nitrification in the ocean. Proceedings of the  
557 National Academy of Sciences, 103(33), 12317–12322.  
558 <https://doi.org/10.1073/pnas.0600756103>
- 559 52. Yao, H. et al. Multi-factorial drivers of ammonia oxidizer communities: Evidence from a  
560 national soil survey. Environ. Microbiol. 15, 2545–2556 (2013).
- 561 53. Zheng, M., Fu, H.-Z. & Ho, Y.-S. Research trends and hotspots related to ammonia  
562 oxidation based on bibliometric analysis. Environ. Sci. Pollut. Res. Int. 24, 20409–20421  
563 (2017).
